# Supplementary material for: Amino acid functionalized blue and phosphorous-doped green fluorescent carbon dots as bioimaging probe
Source: Royal Society of Chemistry journal article supplement (doi:10.1039/c5ra09905f), 2015-01-01
Supplement: c5ra09905f1.pdf [file c5ra09905f1.pdf]

## **Electronic Supplementary Information**

### **Amino acid functionalized blue and phosphorous-doped green fluorescent carbon dots as bioimaging probe**

Saheli Sarkar, Krishnendu Das, Moumita Ghosh and Prasanta Kumar Das\*

*Department of Biological Chemistry, Indian Association for the Cultivation of Science  
Jadavpur, Kolkata – 700 032, India*

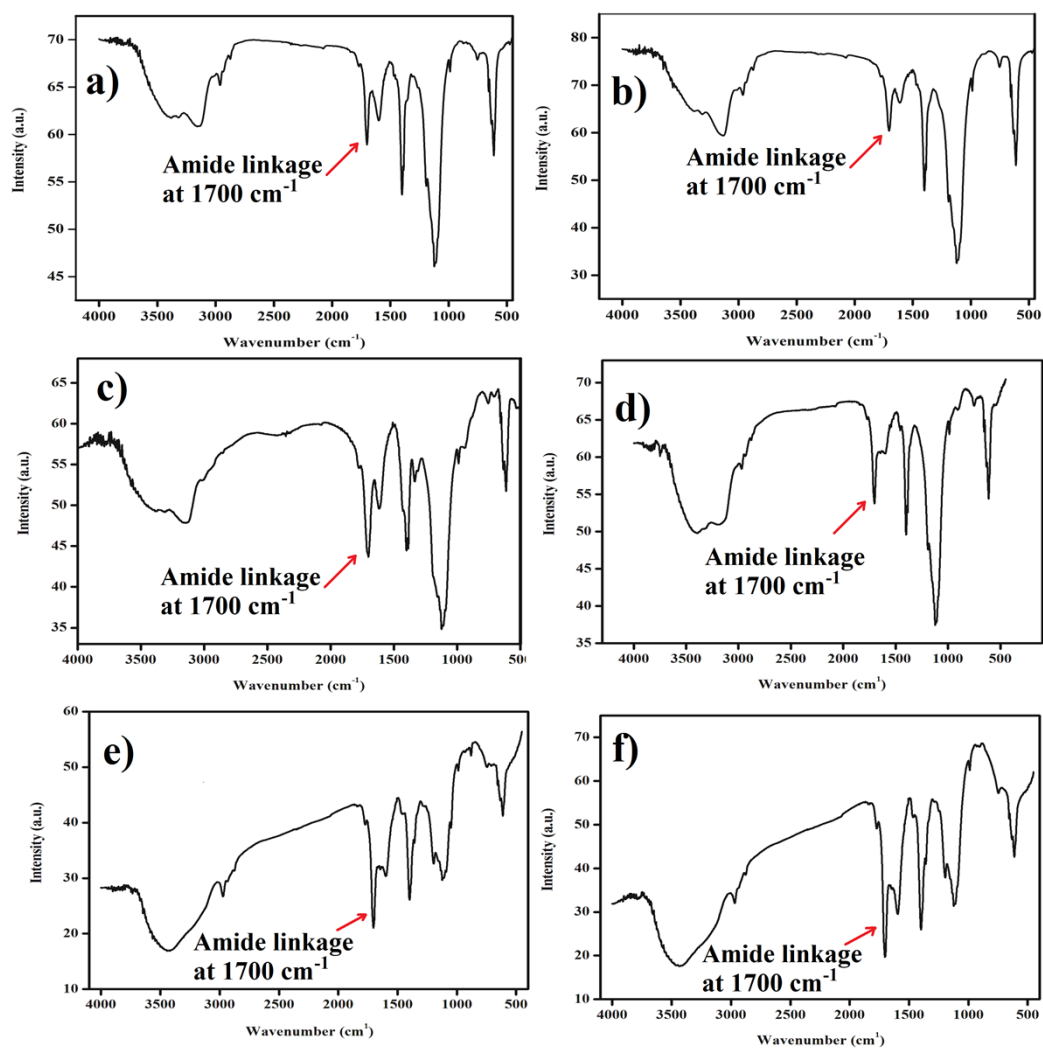

**Fig. S1** IR spectrum of (a) CD<sub>iso</sub> (b) PCD<sub>iso</sub> (c) CD<sub>gly</sub>, (d) PCD<sub>gly</sub> (e) CD<sub>val</sub> and (f) PCD<sub>val</sub>

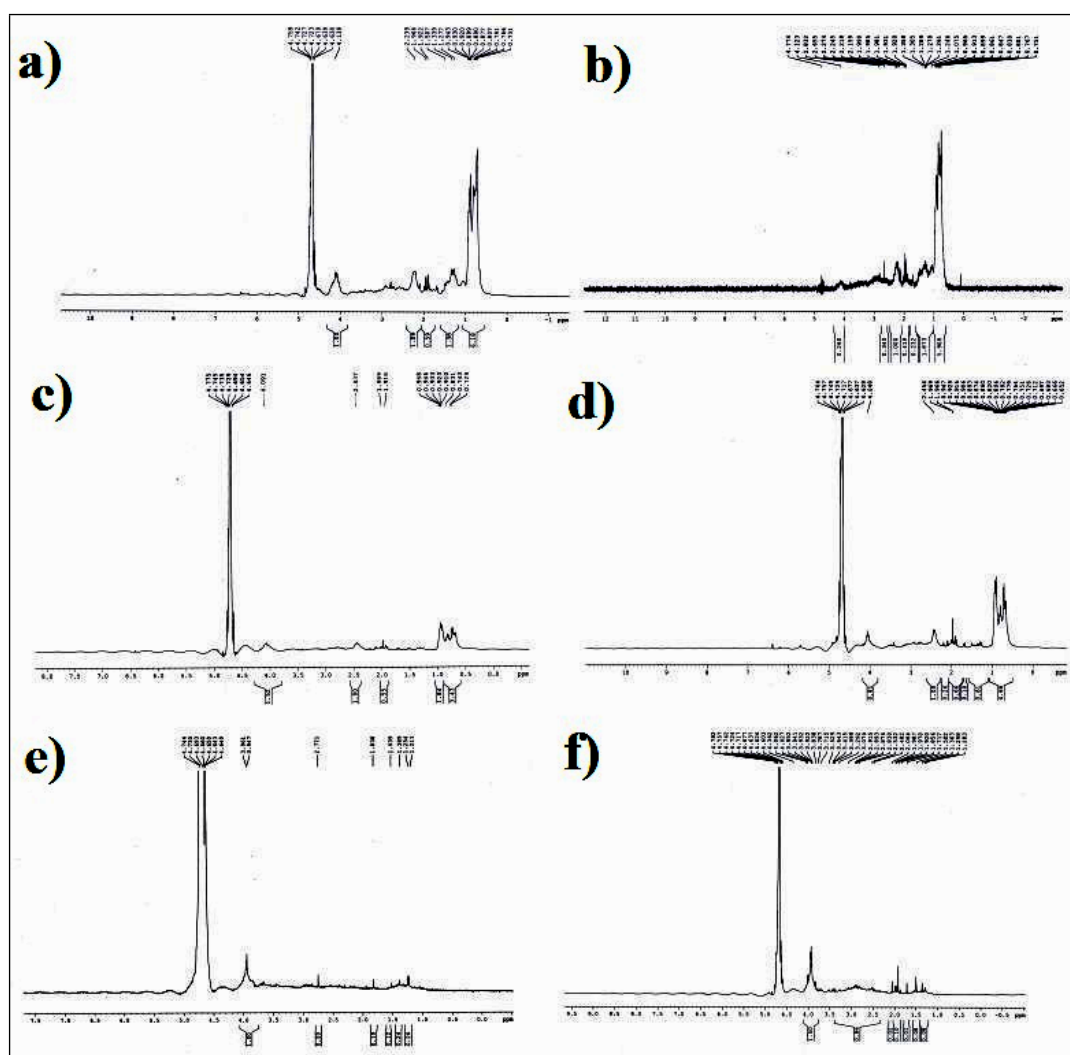

**Fig. S2** NMR spectrum of (a)  $\text{CD}_{\text{iso}}$ , (b)  $\text{PCD}_{\text{iso}}$ , (c)  $\text{CD}_{\text{val}}$ , (d)  $\text{PCD}_{\text{val}}$ , (e)  $\text{CD}_{\text{gly}}$ , (f)  $\text{PCD}_{\text{gly}}$

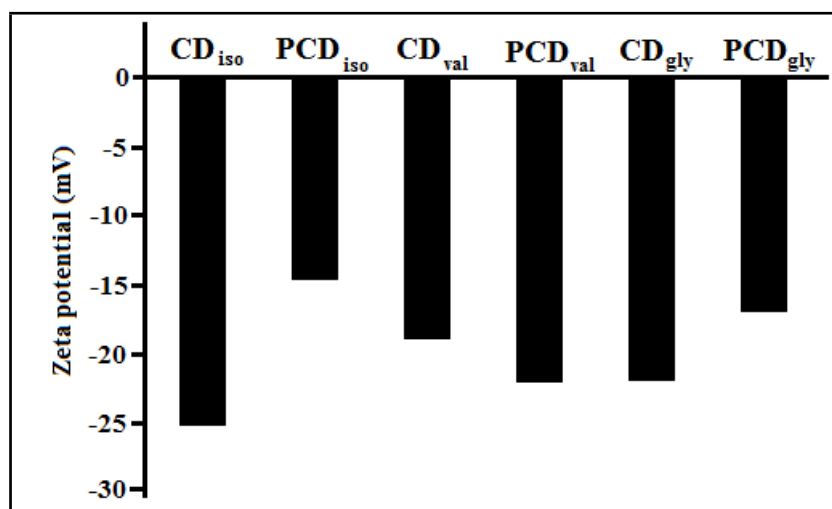

**Fig. S3** Zeta potential values of CDs and PCDs.

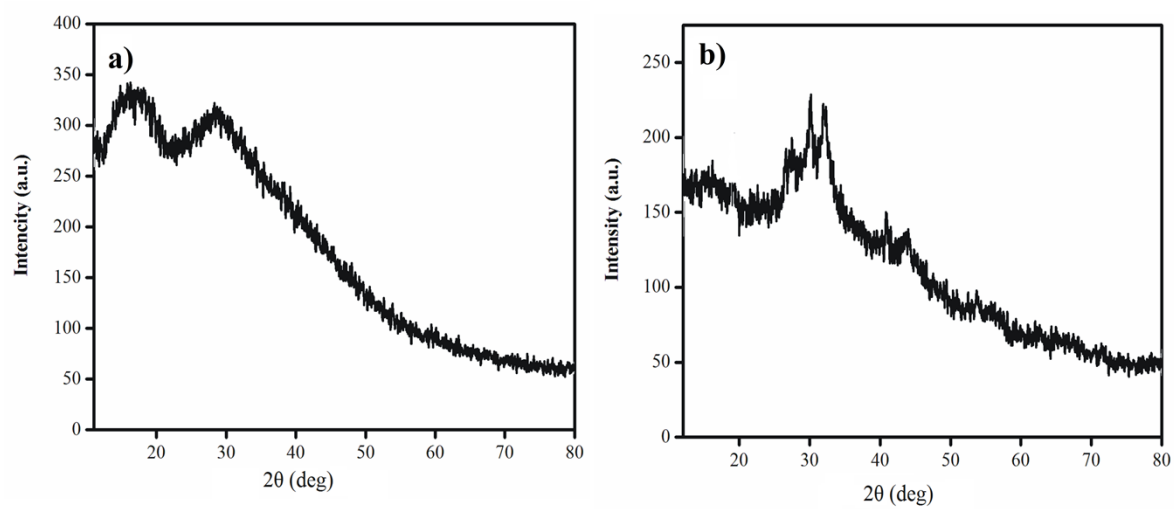

**Fig. S4** XRD pattern of (a)  $CD_{val}$  and (b)  $PCD_{val}$

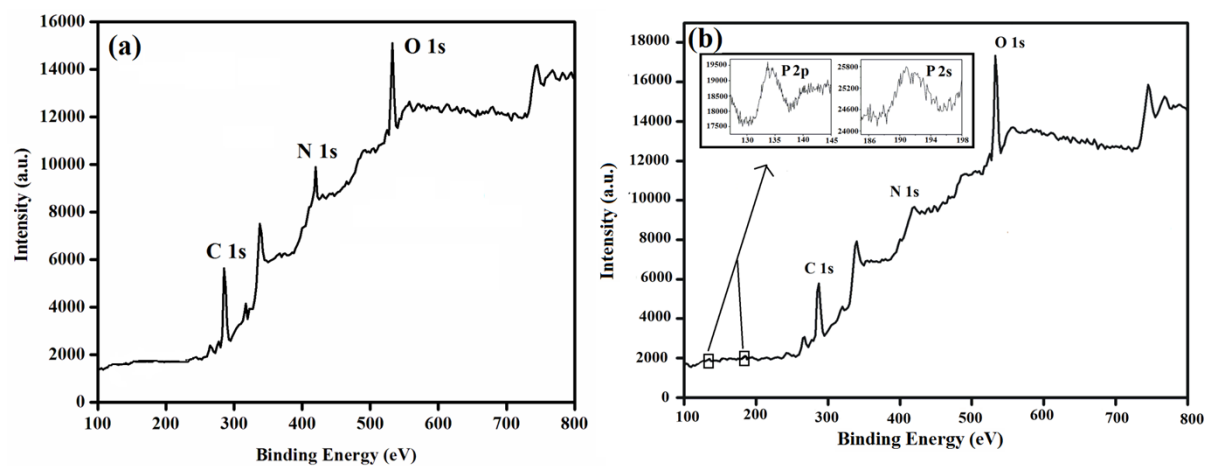

**Fig. S5** XPS pattern of (a)  $CD_{val}$  and (b)  $PCD_{val}$

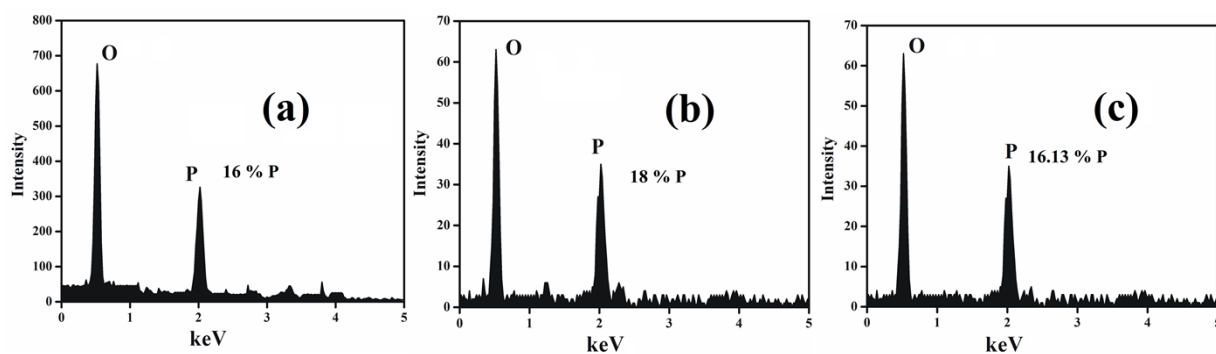

**Fig. S6** EDX analysis of phosphorous doped carbon dots ((a) PCD<sub>iso</sub>, (b) PCD<sub>gly</sub>, (c) PCD<sub>val</sub>). Sample was crusted on carbon coated Cu grid for the experiment. Thus, C content was not included in EDX analysis.

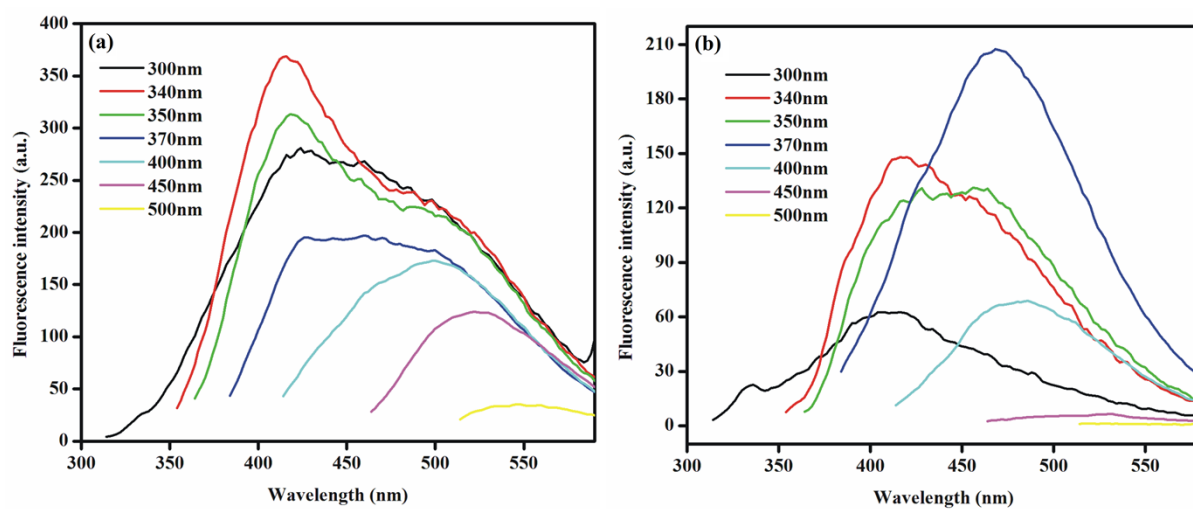

**Fig. S7** Excitation dependence emission of (a) CD<sub>gly</sub> and (b) PCD<sub>gly</sub>. Excitation wavelength was varied from 300 nm to 500 nm.



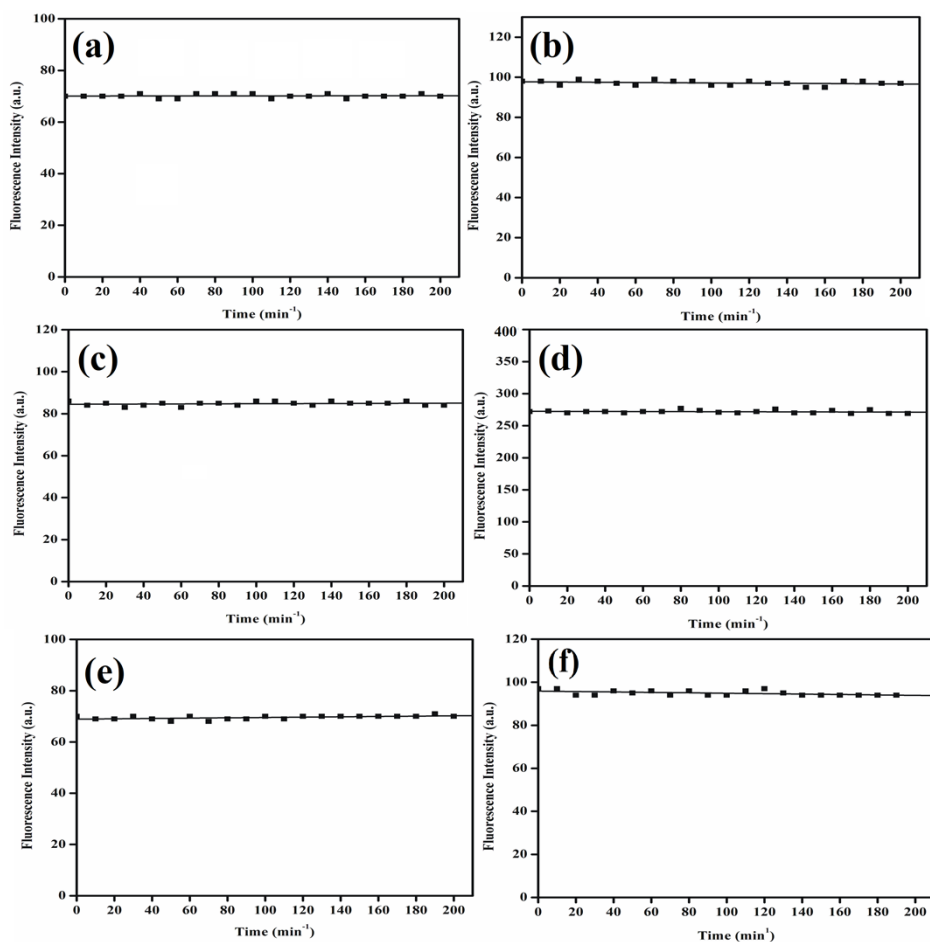

**Fig. S8** Photostability of (a)  $\text{CD}_{\text{iso}}$  (b)  $\text{PCD}_{\text{iso}}$  (c)  $\text{CD}_{\text{gly}}$  (d)  $\text{PCD}_{\text{gly}}$  (e)  $\text{CD}_{\text{val}}$  and (f)  $\text{PCD}_{\text{val}}$  solutions under UV (wavelength 365 nm, power 12 W) light irradiation upto 200 minutes. CDs and PCDs solution were excited at 340 nm and 370 nm, respectively.
